# Supplementary material for: Alterations of the gut microbiota in patients with postherpetic neuralgia
Source: PubMed Central journal article supplement (PMC10558420; doi:10.1186/s13568-023-01614-y), 2023-10-06

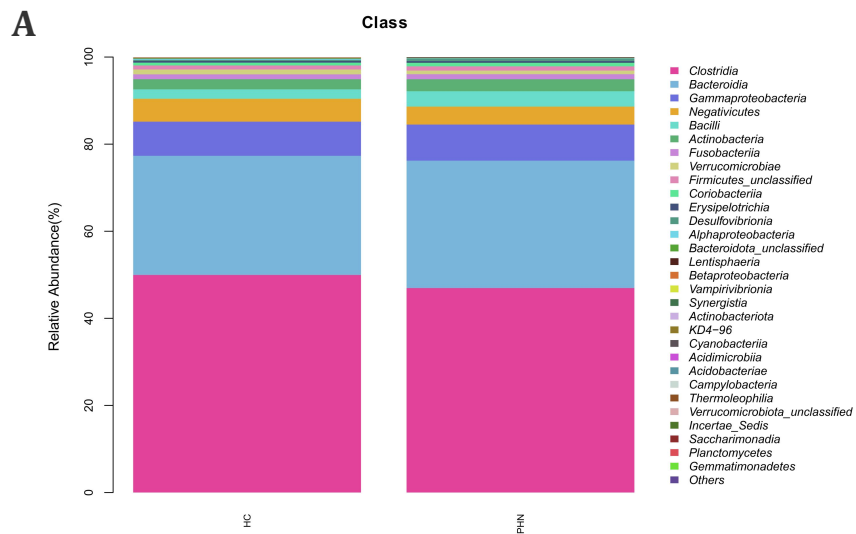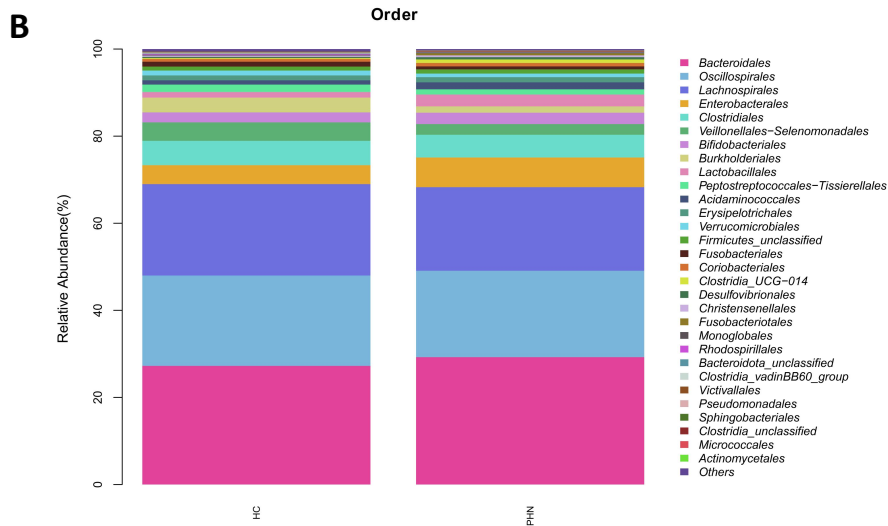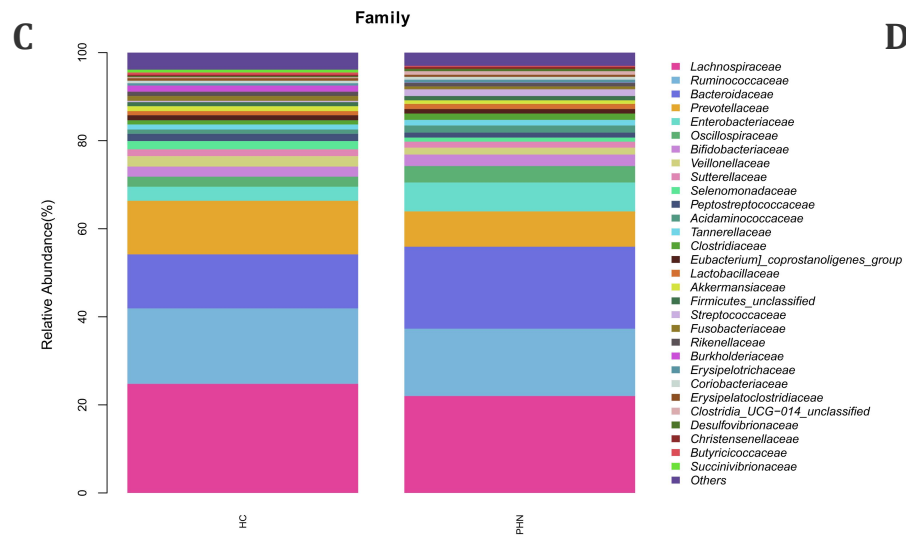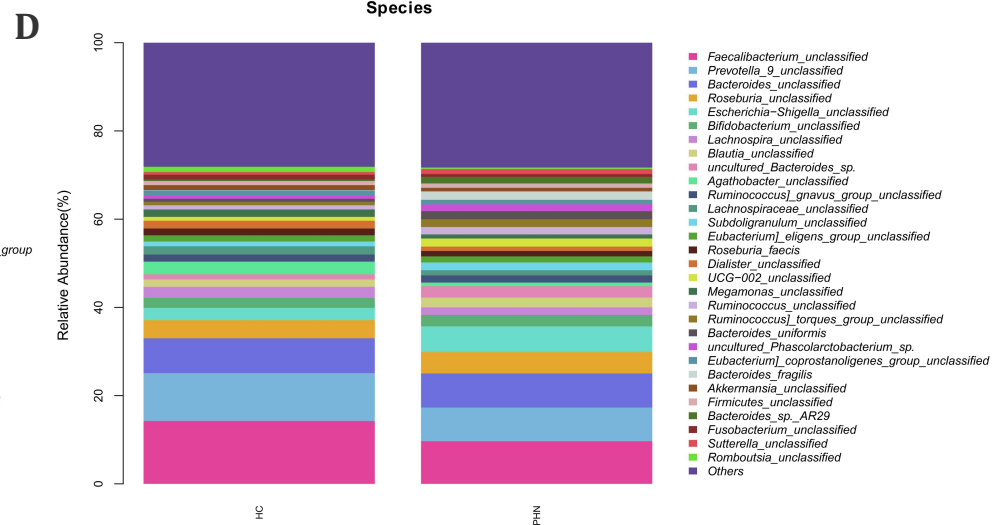

Supplement: 13568_2023_1614_MOESM1_ESM.pdf [file 13568_2023_1614_MOESM1_ESM.pdf]
